# Supplementary material
Source: publisher site journal article supplement (https://www.dovepress.com/article/599044)
Supplement: Supplementary file 1 [file 599044%20Revised%20Supplementary%20Tables.docx]

**Supplementary Table 1**

Comparison of baseline characteristics between the patients included and excluded in the study

| Characteristics | Patients included in the study (n=11269) | Patients excluded in the study (n=544) | P |
| --- | --- | --- | --- |
| Age |  |  | 0.470 |
| 60-69 | 4657(41.33) | 223(40.99) |  |
| 70-79 | 4759(42.23) | 221(40.63) |  |
| ≥80 | 1853(16.44) | 100(18.38) |  |
| Gender |  |  | 0.175 |
| Male | 6004(53.28) | 306(56.25) |  |
| Female | 5265(46.72) | 238(43.75) |  |
| Residence |  |  |  |
| Urban | 7794(69.16 ) | 392(72.06) | 0.153 |
| Rural | 3475(30.84 ) | 152(27.94) |  |
| Marital status |  |  |  |
| Unmarried/divorced / widowed | 956(8.49) | 58(10.66) | 0.076 |
| Spouse/ partner | 10313(91.51) | 486(89.34) |  |
| Education status, |  |  |  |
| Primary or below | 6040(53.60) | 310(56.98) | 0.259 |
| Middle or high school | 4913(43.60) | 222(40.81) |  |
| College or above | 316(2.80) | 12(2.21) |  |
| Sources of income |  |  |  |
| Pension | 1650(14.64) | 86(15.81) | 0.129 |
| Full-time income | 9336(82.85) | 436(80.15) |  |
| Part-time income | 157(1.39) | 12(2.21) |  |
| No income | 126(1.12) | 10(1.84) |  |
| Nursing care level |  |  |  |
| Intensive care | 85(0.76) | 6(1.10) | 0.388 |
| ‌Level 1 Care ‌ | 5213(46.26) | 245(45.04) |  |
| ‌Level 2 Care ‌ | 5966(52.94) | 292(53.68) |  |
| ‌Level 3 Care ‌ | 5(0.04) | 1(0.18) |  |
| Sleep disturbance |  |  |  |
| None | 6041(53.61) | 270(49.63) | 0.113 |
| Mild/moderate | 4749(42.14) | 244(44.85) |  |
| Severe | 479(4.25) | 30(5.52) |  |
| ‌Chronic diseases |  |  |  |
| Yes | 6304(55.94) | 316(58.09) | 0.324 |
| No | 4965(44.06) | 228(41.91) |  |
| Self-reported health |  |  | 0.095 |
| Good | 7032(62.40) | 320(58.82) |  |
| Fair | 3540(31.41) | 177(32.54) |  |
| Poor | 489(4.34) | 34(6.25) |  |
| Very poor | 208(1.85) | 13(2.39) |  |
| Pain |  |  | 0.138 |
| Yes | 9890(87.76) | 489(89.89) |  |
| No | 1379(12.24) | 55(10.11) |  |
| Healthcare Payment Source |  |  | 0.256 |
| Urban Employee Basic Medical Insurance | 4569(40.55) | 206(37.87) |  |
| Urban and Rural Resident Basic Medical Insurance | 5646(50.10) | 279(51.29) |  |
| New Rural Cooperative Medical（NCMS） | 55(0.49) | 6(1.10) |  |
| Out-of-pocket (OOP)‌ | 506(4.49) | 27(4.96) |  |
| Other payment sources | 493(4.37) | 26(4.78) |  |

**Supplementary Table 2**

Case of variable assignment.

| Variable | Assignment mode |
| --- | --- |
| Gender | 0= Male; 1=Female |
| Age | 0=60-69; 1=70-79; 2=≥80 |
| Marital status | 0= Spouse/partner ;1=Unmarried/divorced/widowed |
| Self-rated health | 1=Good; 2= Fair; 3=Poor; 4=Very poor |
| ‌Chronic diseases | 0=No; 1=Yes |
| Pain | 0=No; 1=Yes |
| Sleep disturbance | 0=None; 1=Mild/moderate; 2=Severe |
| Sources of income | 1=Pension; 2=Full-time income; 3=Part-time income; 4=No income |
| depressive symptoms | 0=No; 1=Yes |
